# Supplementary material for: Borrelia burgdorferi-specific IgA in Lyme Disease
Source: PubMed Central journal article supplement — eBioMedicine. 2017 Apr 21;19:91–7. doi: 10.1016/j.ebiom.2017.04.025 (PMC5440658; doi:10.1016/j.ebiom.2017.04.025), 2017-04-21
Supplement: mmc1.pdf [file mmc1.pdf]

**Supplementary Table 1. Clinical manifestations of early Lyme disease patients from the Northeast.**

| Patient | IgA Positive | Gender | Age | Routine Lyme Serology Result <sup>1</sup> | Single/Multiple EM <sup>1</sup> | EM duration at entry (days) <sup>1</sup> | EM size (cm) <sup>1,2</sup> | EM area (cm <sup>2</sup> ) <sup>1,2</sup> | Clinical Manifestations <sup>1</sup>                                                                                                  |
|---------|--------------|--------|-----|-------------------------------------------|---------------------------------|------------------------------------------|-----------------------------|-------------------------------------------|---------------------------------------------------------------------------------------------------------------------------------------|
| 1       | Yes          | F      | 48  | Pos                                       | M                               | 2                                        | 3x6                         | 18                                        | Arthralgia, fatigue, headache, myalgia, stiff neck                                                                                    |
| 8       | Yes          | F      | 62  | Pos                                       | M                               | 8                                        | 29x17                       | 493                                       | Arthralgia upon first visit and subsequent visits, hand for 2 yrs, elbow 2 months, shoulder 3 months before entry into study; fatigue |
| 9       | Yes          | M      | 86  | Pos                                       | M                               | 5                                        | 16x8.5                      | 136                                       | Fatigue, headache                                                                                                                     |
| 11      | Yes          | M      | 22  | Pos                                       | M                               | 7                                        | 19x16                       | 304                                       | Arthralgia, fatigue, headache, myalgia, stiff neck                                                                                    |
| 12      | Yes          | F      | 70  | Pos                                       | M                               | 3                                        | 60x24                       | 1440                                      | Arthralgia, fatigue, myalgia, Neuro-radiculitis, meningitis,                                                                          |
| 13      | Yes          | M      | 54  | Pos                                       | M                               | 4                                        | 10x8                        | 80                                        | Arthralgia (>10 yrs), dizziness, fatigue, headache, myalgia, stiff neck, tingling (pre-Lyme diagnosis)                                |
| 18      | Yes          | M      | 31  | Pos                                       | M                               | 60                                       | 47x22                       | 1034                                      | Arthralgia, fatigue, headache, stiff neck, tingling, Neuro-facial palsy, meningitis-12 days                                           |
| 20      | Yes          | M      | 40  | Pos                                       | M                               | 5                                        | 12x15                       | 180                                       | Dizziness, fatigue, tingling, Nystagmus, balance problems, confusion, possible meningitis-5 days                                      |
| 23      | Yes          | M      | 53  | Pos                                       | M                               | 2                                        | 10.5x5                      | 52.5                                      | Arthralgia, fatigue                                                                                                                   |
| 24      | Yes          | M      | 35  | Pos                                       | M                               | 6                                        | 19x20                       | 380                                       | Fatigue, myalgia, stiff neck, Neuro-mild right facial palsy-14 days duration at entry                                                 |
| 2       | No           | F      | 84  | ND <sup>3</sup>                           | S                               | 5                                        | 8x10                        | 80                                        | Tingling for 1 week near EM                                                                                                           |
| 3       | No           | M      | 46  | Neg                                       | S                               | 4                                        | 9x9                         | 81                                        | Myalgia                                                                                                                               |
| 4       | No           | F      | 64  | Neg                                       | M                               | 5                                        | 8x13.5                      | 108                                       | Headache                                                                                                                              |
| 5       | No           | M      | 64  | Pos                                       | S                               | 4                                        | 11x9                        | 99                                        | None reported                                                                                                                         |
| 6       | No           | M      | 46  | Pos                                       | M                               | 11                                       | 9x11                        | 99                                        | Arthralgia, dizziness, fatigue, prior LD in 2002, 2008                                                                                |
| 7       | No           | F      | 56  | Pos                                       | S                               | 8                                        | 10x10                       | 100                                       | Fatigue, headache                                                                                                                     |
| 10      | No           | M      | N/A | Pos                                       | No skin lesion <sup>5</sup>     | N/A                                      | N/A                         | N/A                                       | 7 <sup>th</sup> nerve palsy                                                                                                           |
| 14      | No           | F      | 56  | Neg                                       | M                               | 3                                        | 4x3.5                       | 14                                        | Arthralgia, fatigue, myalgia                                                                                                          |
| 15      | No           | F      | 55  | Pos                                       | S                               | 2                                        | 9.5x10.5                    | 99.8                                      | Arthralgia (pre-Lyme diagnosis)                                                                                                       |
| 16      | No           | F      | 42  | Pos                                       | S                               | 4                                        | 8.5x6                       | 51                                        | Fatigue                                                                                                                               |
| 17      | No           | M      | 32  | Pos                                       | M                               | 7                                        | 10x5                        | 50                                        | Arthralgia, fatigue                                                                                                                   |
| 19      | No           | F      | 63  | Pos                                       | S                               | 4                                        | 11x22                       | 242                                       | Fatigue, headache, myalgia                                                                                                            |
| 21      | No           | F      | 45  | Neg                                       | S                               | 1                                        | 7.5x4.5                     | 33.8                                      | Arthralgia, fatigue, dizziness, headache, myalgia, stiff neck                                                                         |
| 22      | No           | M      | 59  | Pos                                       | M                               | 4                                        | 4x5.5                       | 22                                        | Fatigue, headache                                                                                                                     |
| 25      | No           | F      | 58  | Neg                                       | M                               | 3                                        | 14x8                        | 112                                       | Arthralgia, dizziness, fatigue, headache, myalgia, stiff neck, tingling                                                               |
| 26      | No           | M      | 40  | Neg                                       | S                               | 2                                        | 12x14                       | 168                                       | None reported                                                                                                                         |
| 27      | No           | M      | 68  | Pos                                       | S                               | 5                                        | 22x27                       | 594                                       | None reported                                                                                                                         |
| 28      | No           | M      | 36  | Pos                                       | M                               | 8                                        | 21x10                       | 210                                       | None reported                                                                                                                         |

<sup>1</sup>-Information obtained at patient's first visit,

<sup>2</sup>-Size of primary lesion

<sup>3</sup>-Not determined

<sup>4</sup>-Contaminated

<sup>5</sup>-Patient was EM negative, however, diagnosis was serologically confirmed

**Supplementary Table 2. Clinical manifestations of early Lyme disease patients from the Upper Midwest.**

| Patient           | Gender | Age | Duration of symptoms at entry | IgA Positivity  | Clinical Manifestations <sup>1</sup>                        |
|-------------------|--------|-----|-------------------------------|-----------------|-------------------------------------------------------------|
| <b>Early Lyme</b> |        |     |                               |                 |                                                             |
| 1                 | M      | 25  | Unknown                       | Yes             | Multiple EM                                                 |
| 2                 | F      | 40  | 14d                           | Yes             | EM                                                          |
| 3                 | M      | 58  | 13d                           | Yes             | EM                                                          |
| 4                 | M      | 25  | 21d                           | Yes             | Cranial neuritis <sup>3</sup>                               |
| 5                 | M      | 60  | Unknown                       | Yes             | EM, Fever, fatigue, myalgias                                |
| 6                 | F      | 61  | 15d                           | Yes             | EM, fever, myalgia                                          |
| 7                 | M      | 61  | Unknown                       | Yes             | Tick exposure, myalgias, arthralgias, jaw pain <sup>3</sup> |
| 8                 | F      | 57  | Unknown                       | Yes             | EM                                                          |
| 9                 | F      | 63  | Unknown                       | Yes             | EM, Chills, fever, myalgias, headache, diplopia,            |
| 10                | F      | 50  | 12d                           | Yes             | EM, Fever, headache, myalgia, arthralgia                    |
| 11                | M      | 7   | 1d                            | Yes             | EM                                                          |
| 13                | F      | 40  | Unknown                       | Yes             | EM, Headache, neck soreness                                 |
| 14                | F      | 19  | 7d                            | Yes             | EM                                                          |
| 15                | M      | 8   | Unknown                       | Yes             | EM, Fever, lethargy                                         |
| 16                | M      | 19  | Unknown                       | Yes             | EM, Headache, myalgias, arthralgias                         |
| 17                | M      | 47  | Unknown                       | Yes             | EM, Malaise, myalgias, arthralgias                          |
| 18                | F      | 27  | Unknown                       | Yes             | EM, Fever, fatigue, headache, myalgias                      |
| 19                | M      | 74  | Unknown                       | Yes             | EM, Chills, headache, chest pain, shortness of breath       |
| 20                | M      | 14  | 14d                           | Yes             | EM, headache, neck pain                                     |
| 22                | F      | 81  | Unknown                       | Yes             | EM, Myalgias, tick bite                                     |
| 25                | M      | 55  | Unknown                       | Yes             | EM, Fever, fatigue, nausea, myalgia                         |
| 26                | M      | 52  | Unknown                       | Yes             | EM, Fever, myalgia, arthralgia, headache, fatigue           |
| 27                | M      | 38  | Unknown                       | Yes             | EM, Malaise, myalgia, headache, fever                       |
| 29                | M      | 8   | Unknown                       | Yes             | EM, headache, myalgia, arthralgia, possible CNS involvement |
| 30                | M      | 69  | Unknown                       | Yes             | EM, fever, fatigue, myalgia                                 |
| 32                | F      | 40  | Unknown                       | Yes             | EM, chills, knee pain, stiff neck, trouble with eye         |
| 34                | F      | 13  | 26d                           | Yes             | EM, headache                                                |
| 31                | M      | 14  | Unknown                       | No <sup>2</sup> | EM, arthralgia                                              |
| 36                | M      | 50  | Unknown                       | No <sup>2</sup> | EM, fever, myalgia, arthralgia, headache                    |
| 12                | F      | 45  | Unknown                       | No              | EM, Tick bite                                               |
| 21                | M      | 6   | Unknown                       | No              | EM, Headache, fever                                         |
| 23                | F      | 40  | Unknown                       | No              | EM, headache, arthralgia, myalgia, fatigue                  |
| 24                | F      | 9   | Unknown                       | No              | EM, fatigue                                                 |
| 28                | M      | 3   | Unknown                       | No              | EM                                                          |
| 33                | F      | 8   | 45d                           | No              | EM, parathesia in hands and feet                            |
| 35                | F      | 11  | Unknown                       | No              | EM, malaise                                                 |
| <b>Late Lyme</b>  |        |     |                               |                 |                                                             |
| 1                 | F      | 58  | Unknown                       | No              | Right knee pain and swelling                                |
| 2                 | M      | 32  | Unknown                       | Yes             | Left knee swelling                                          |
| 3                 | M      | 57  | Unknown                       | No              | Right knee and left elbow pain and swelling                 |
| 4                 | F      | 34  | Unknown                       | No              | Left knee pain & swelling, fatigue, myalgias                |
| 5                 | M      | 42  | Unknown                       | Yes             | Left knee, ankle, and foot pain & swelling                  |
| 6                 | F      | 58  | Unknown                       | No              | Left knee pain & swelling                                   |
| 7                 | M      | 13  | Unknown                       | No              | Right knee & leg swelling                                   |
| 8                 | M      | 67  | Unknown                       | No              | Swollen painful knee                                        |
| 9                 | F      | 15  | Unknown                       | No              | Chronic left knee arthritis                                 |
| 10                | M      | 10  | Unknown                       | Yes             | Right knee pain & swelling                                  |
| 11                | M      | 69  | Unknown                       | Yes             | Bilateral knee arthritis                                    |
| 12                | M      | 10  | Unknown                       | No              | Acute Lyme arthritis                                        |
| 13                | M      | 73  | Unknown                       | Yes             | Left knee swelling & pain                                   |
| 14                | M      | 9   | Unknown                       | No              | Left knee & wrist pain & swelling                           |
| 15                | M      | 9   | Unknown                       | No              | Left knee pain & swelling                                   |
| 16                | F      | 8   | Unknown                       | No              | Left wrist pain & swelling                                  |
| 17                | M      | 12  | Unknown                       | No              | Left knee pain & swelling                                   |
| 18                | M      | 8   | Unknown                       | Yes             | Right knee pain & swelling                                  |
| 19                | F      | 57  | Unknown                       | No              | Right knee pain                                             |

<sup>1</sup>-Clinical data are reported as provided. All patients were serologically positive by whole cell ELISA (VIDAS).

<sup>2</sup>-patient had equivocal antibody binding to either FlaB-mV or C6 (greater than 2SD but less than 3SD from the mean absorbance of nonendemic healthy controls)

<sup>3</sup>-EM was not reported in the patient's chart, however, diagnosis was confirmed serologically
